# Supplementary figures and images for: Benzophenone Suppression of Quercetin Antioxidant Activity towards Lipids under UV‐B Irradiation Regime: Detection by HPLC Chromatography
Source: Hindawi journal article supplement (doi:10.1155/2013/761675), 2013-01-01

ANNEX

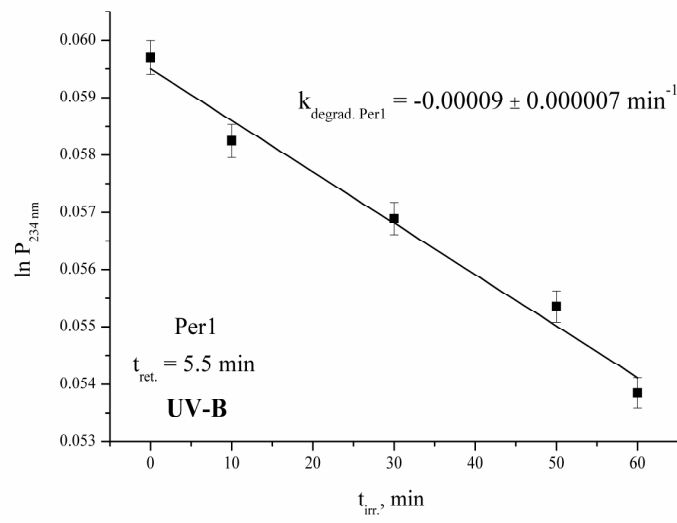

**Fig.Add-1.**

Supplement: f1 [file 761675.f1.pdf]
